# Supplementary material for: Cyclomodulins and Hemolysis in E. coli as Potential Low-Cost Non-Invasive Biomarkers for Colorectal Cancer Screening
Source: Life (Basel). 2021 Oct 31;11(11):1165. doi: 10.3390/life11111165 (PMC8621933; doi:10.3390/life11111165)
Supplement: Supplementary file 1 [file life-11-01165-s001.zip › Supplementary_data.xlsx]

## Sheet: List1
Patient	Age	Sex	Diagnosis	TNM classification	E. coli strain number	hemolysis	clbB	clbN	cdtB	cnf1
Patient 1	77	F	C20	T3 N0 M0	1	─	─	─	─	─
Patient 2	56	M	C20	T1 N0 M0	1	+	+	+	─	+
Patient 2	56	M	C20	T1 N0 M0	2	─	─	─	─	─
Patient 3	76	F	C182	T4b N0 MX	1	─	─	─	─	─
Patient 4	54	F	K643	control	1	+	+	+	─	+
Patient 5	69	M	C20	T3 N1 MX	1	─	─	─	─	─
Patient 6	67	F	C180	n.a.	1	+	+	+	─	+
Patient 7	64	F	C20	T3 N2a M1a	1	+	─	─	+	+
Patient 8	78	F	D128	control	1	─	─	─	─	─
Patient 9	73	M	C182	T3 N1b M0	none cultured	n.a.	n.a.	n.a.	n.a.	n.a.
Patient 10	65	F	K643	control	1	─	─	─	+	─
Patient 10	65	F	K643	control	2	+	+	+	─	+
Patient 11	85	F	C187	T1 N0 MX	1	+	─	─	─	+
Patient 11	85	F	C187	T1 N0 MX	2	─	─	─	─	─
Patient 12	64	M	C20	T3 N0 M0	none cultured	n.a.	n.a.	n.a.	n.a.	n.a.
Patient 13	70	F	C19	T3 N0 MX	1	+	+	+	─	+
Patient 13	70	F	C19	T3 N0 MX	2	─	─	─	─	─
Patient 13	70	F	C19	T3 N0 MX	3	─	─	─	─	─
Patient 14	73	M	C182	TX NX M1	1	─	─	─	─	─
Patient 14	73	M	C182	TX NX M1	2	─	─	─	─	─
Patient 14	73	M	C182	TX NX M1	3	─	+	+	+	─
Patient 15	64	M	C20	T2 N0 MX	1	─	+	+	+	─
Patient 16	72	F	K642	control	1	─	─	─	─	─
Patient 17	51	F	K642	control	1	─	─	─	─	─
Patient 17	51	F	K642	control	2	─	─	─	─	─
Patient 18	79	M	C19	T3 N0 MX	1	─	─	─	─	─
Patient 19	66	M	C20	T3 N2a M1	1	─	─	─	─	─
Patient 19	66	M	C20	T3 N2a M1	2	─	─	─	─	─
Patient 20	60	M	K642	control	1	─	─	─	─	─
Patient 20	60	M	K642	control	2	─	─	─	─	─
Patient 21	79	M	D384	control	1	─	─	─	─	─
Patient 22	80	M	C20	T2 N0 MX	1	─	─	─	─	─
Patient 23	57	M	C20	T3 N1 M0	1	─	─	─	─	─
Patient 24	73	F	C180	T3 N2b MX	1	─	─	─	─	─
Patient 25	66	F	C20	T3 N0 MX	1	─	─	─	─	─
Patient 25	66	F	C20	T3 N0 MX	2	─	─	─	─	─
Patient 26	72	M	C186	T3 N2b MX	1	─	─	─	─	─
Patient 26	72	M	C186	T3 N2b MX	2	─	─	─	─	─
Patient 27	65	M	C20	T3 N0 M0	1	─	─	─	─	─
Patient 27	65	M	C20	T3 N0 M0	2	─	─	─	─	─
Patient 27	65	M	C20	T3 N0 M0	3	─	─	─	─	─
Patient 28	73	M	C19	n.a.	none cultured	n.a.	n.a.	n.a.	n.a.	n.a.
Patient 29	60	M	K642	control	1	─	─	─	─	─
Patient 30	67	M	C185	T4b N2a M1a	1	─	─	─	─	─
Patient 31	71	F	C20	T1 N0 M0	1	+	+	+	─	+
Patient 31	71	F	C20	T1 N0 M0	2	+	+	+	─	─
Patient 32	61	F	C20	T1 N0 M0	1	─	─	─	─	─
Patient 33	50	F	K805	control	1	─	─	─	─	─
Patient 34	67	M	C189	T2 N1 M0	none cultured	n.a.	n.a.	n.a.	n.a.	n.a.
Patient 35	57	M	C19	T3 N1 MX	1	─	─	─	─	─
Patient 36	52	F	C20	n.a.	1	─	─	─	─	─
Patient 37	57	M	C19	n.a.	1	─	─	─	─	─
Patient 38	75	F	C182	T3 N1a M0	1	─	─	─	─	─
Patient 39	58	F	K604	control	1	─	─	─	─	─
Patient 40	67	M	C20	T2 N0 MX	1	─	─	─	─	─
Patient 41	67	F	C180	T1 N0 MX	1	+	+	+	─	+
Patient 41	67	F	C180	T1 N0 MX	2	─	─	─	─	─
Patient 42	71	M	C187	T3 N0 MX	1	+	+	+	─	+
Patient 42	71	M	C187	T3 N0 MX	2	─	─	─	─	─
Patient 43	75	M	C182	T3 N0 MX	1	─	+	+	─	─
Patient 43	75	M	C182	T3 N0 MX	2	─	─	─	─	─
Patient 44	77	M	C19	T3 N0 M0	1	+	+	+	─	+
Patient 44	77	M	C19	T3 N0 M0	2	─	─	─	─	─
Patient 45	66	M	K409	control	1	─	─	─	+	─
Patient 46	59	M	C180	T3 N2 M1	1	─	─	─	─	─
Patient 47	86	M	K610	control	1	─	─	─	─	─
Patient 48	54	M	K429	control	none cultured	n.a.	n.a.	n.a.	n.a.	n.a.
Patient 49	56	M	K409	control	1	+	+	+	─	+
Patient 49	56	M	K409	control	2	─	+	+	─	─
Patient 50	60	M	K642	control	none cultured	n.a.	n.a.	n.a.	n.a.	n.a.
Patient 51	65	F	C20	T1 N0 M0	1	─	─	─	─	─
Patient 52	52	M	K802	control	none cultured	n.a.	n.a.	n.a.	n.a.	n.a.
Patient 53	63	F	C20	T3 N0 M0	1	─	─	─	─	─
Patient 54	69	M	C182	T3 N2b MX	1	─	+	+	─	─
Patient 54	69	M	C182	T3 N2b MX	2	─	─	─	─	─
Patient 55	67	M	K409	control	1	─	─	─	─	─
Patient 56	69	M	K409	control	1	─	─	─	─	─
Patient 57	70	M	K802	control	1	─	─	─	─	─
Patient 58	80	F	C182	T3 N1a MX	1	─	─	─	─	─
Patient 59	60	M	K429	control	1	─	─	─	─	─
Patient 60	72	M	K409	control	1	─	─	─	─	─
Patient 61	67	M	K804	control	1	─	─	─	─	─
Patient 61	67	M	K804	control	2	─	─	─	─	─
Patient 62	57	F	K643	control	1	─	─	─	+	─
Patient 63	73	M	C20	T4 N1 M1	1	─	─	─	─	─
Patient 64	78	M	K802	control	1	─	+	+	─	─
Patient 65	78	M	K409	control	none cultured	n.a.	n.a.	n.a.	n.a.	n.a.
Patient 66	70	F	K805	control	1	─	─	─	─	─
Patient 67	74	F	C20	T2 N0 M0	1	─	─	─	─	─
Patient 68	76	M	C182	T4a N0 M0	1	+	+	+	─	+
Patient 68	76	M	C182	T4a N0 M0	2	─	─	─	─	─
Patient 69	75	M	K429	control	1	─	─	─	+	─
Patient 70	56	M	D374	adenoma	1	─	─	─	─	─
Patient 71	59	M	K808	control	1	+	+	+	─	+
Patient 72	61	M	K409	control	1	─	+	+	─	─
Patient 73	66	F	C509	control	1	─	─	─	─	─
Patient 74	57	F	C20	T1 N0 MX	1	─	─	─	─	─
Patient 74	57	F	C20	T1 N0 MX	2	+	+	+	─	─
Patient 75	72	M	C19	T3 N0 M0	1	+	+	+	─	+
Patient 75	72	M	C19	T3 N0 M0	2	+	+	+	─	+
Patient 76	71	F	C180	T4a N2b M1	1	─	─	─	─	─
Patient 76	71	F	C180	T4a N2b M1	2	─	─	─	─	─
Patient 77	72	M	C186	T2 N0 M0	1	+	+	+	─	─
Patient 77	72	M	C186	T2 N0 M0	2	─	─	─	─	─
Patient 78	60	M	K802	control	1	─	─	─	─	─
Patient 79	60	F	K802	control	1	─	+	+	─	─
Patient 80	77	M	C19	T3 N0 M0	1	─	─	─	─	─
Patient 81	81	F	C19	T2 N0 M0	1	─	─	─	─	─
Patient 82	60	M	C183	T3 N1 MX	1	─	─	─	─	─
Patient 82	60	M	C183	T3 N1 MX	2	─	─	─	─	─
Patient 83	66	F	C19	T1 N0 M0	1	+	+	+	─	+
Patient 84	75	M	C20	T1 N0 M0	1	+	+	+	─	+
Patient 85	76	F	C504	control	1	─	─	─	─	─
Patient 86	53	M	K409	control	1	─	─	─	─	─
Patient 87	50	M	K643	control	1	─	─	─	─	─
Patient 88	78	F	C509	control	1	─	─	─	─	─
Patient 89	76	F	K802	control	1	─	─	─	─	─
Patient 90	70	M	C180	T3 N1 M1	none cultured	n.a.	n.a.	n.a.	n.a.	n.a.
Patient 91	56	F	C20	T3 N2 M1	1	─	─	─	─	─
Patient 92	67	F	K802	control	1	─	─	─	─	─
Patient 93	76	F	C20	T3 N0 M0	1	+	+	+	─	+
Patient 94	65	F	K801	control	none cultured	n.a.	n.a.	n.a.	n.a.	n.a.
Patient 95	68	F	K409	control	none cultured	n.a.	n.a.	n.a.	n.a.	n.a.
Patient 96	70	F	K409	control	1	─	─	─	─	─
Patient 97	76	M	C20	T4 N1 M0	1	─	+	+	─	─
Patient 98	66	F	C184	T3 N0 M0	1	─	─	─	─	─
Patient 99	73	F	K432	control	1	─	+	+	─	─
Patient 100	58	M	K429	control	1	+	+	+	─	─
Patient 101	69	F	C187	T4 N1 M0	1	+	+	+	─	+
Patient 101	69	F	C187	T4 N1 M0	2	+	─	─	─	─
Patient 102	61	F	K642	control	1	─	─	─	─	─
Patient 103	72	F	D128	adenoma	1	+	+	+	─	+
Patient 103	72	F	D128	adenoma	2	─	+	+	─	+
Patient 104	60	M	K429	control	1	─	─	─	─	─
Patient 104	60	M	K429	control	2	─	─	─	─	─
Patient 104	60	M	K429	control	3	+	+	+	─	+
Patient 105	59	M	K429	control	1	─	─	─	─	─
Patient 105	59	M	K429	control	2	─	─	─	─	─
Patient 106	76	F	C503	control	1	─	─	─	─	─
Patient 106	76	F	C503	control	2	─	─	─	─	─
Patient 107	69	M	C20	T3 N2a M0	1	─	+	+	+	─
Patient 108	70	F	K802	control	none cultured	n.a.	n.a.	n.a.	n.a.	n.a.
Patient 109	53	M	K409	control	1	+	+	+	+	+
Patient 110	61	F	K642	control	1	─	─	─	─	─
Patient 111	75	F	K409	control	1	+	+	+	─	+
Patient 112	69	F	C180	T3 N2 M0	1	─	─	─	─	─
Patient 112	69	F	C180	T3 N2 M0	2	─	─	─	─	─
Patient 113	75	F	K573	control	1	─	─	─	─	─
Patient 114	57	F	K429	control	1	─	─	─	─	─
Patient 114	57	F	K429	control	2	─	─	─	─	─
Patient 115	68	F	K802	control	1	─	─	─	─	─
Patient 115	68	F	K802	control	2	─	─	─	─	─
Patient 116	64	M	C186	T4b N2a N0	1	+	+	+	─	+
Patient 116	64	M	C186	T4b N2a N0	2	─	─	─	─	─
Patient 117	73	F	K449	control	1	─	─	─	─	─
Patient 118	68	F	K802	control	1	─	─	─	─	─
Patient 119	71	M	C187	T2 N0 M0	1	+	+	+	─	+
Patient 119	71	M	C187	T2 N0 M0	2	─	─	─	─	─
Patient 119	71	M	C187	T2 N0 M0	3	─	─	─	─	─
Patient 120	64	M	K802	control	1	─	─	─	─	─
Patient 120	64	M	K802	control	2	─	─	─	─	─
Patient 121	60	F	C509	control	1	─	─	─	─	─
Patient 122	53	M	C160	control	1	─	─	─	+	─
Patient 123	79	F	C509	control	1	─	+	+	─	─
Patient 123	79	F	C509	control	2	+	+	+	─	+
Patient 124	71	F	K802	control	1	─	─	─	─	─
Patient 125	71	F	K802	control	1	─	─	─	─	─
Patient 126	54	M	K429	control	1	─	─	─	─	─
Patient 126	54	M	K429	control	2	─	─	─	─	─
Patient 127	65	F	C509	control	1	─	─	─	─	─
Patient 128	69	M	K802	control	1	─	+	+	─	─
Patient 129	88	M	K409	control	1	─	─	─	─	─
Patient 129	88	M	K409	control	2	─	─	─	─	─
Patient 129	88	M	K409	control	3	─	─	─	─	─
Patient 129	88	M	K409	control	4	─	─	─	─	─
Patient 130	61	M	C20	T3 N2b M0	1	─	─	─	─	─
Patient 130	61	M	C20	T3 N2b M0	2	─	─	─	─	─
Patient 131	65	M	K802	control	1	─	─	─	─	─
Patient 132	67	M	K432	control	1	─	─	─	─	─
Patient 132	67	M	K432	control	2	─	─	─	─	─
Patient 132	67	M	K432	control	3	+	+	+	─	+
Patient 133	60	M	C187	T4a N2a M1	1	─	+	+	─	─
Patient 134	70	M	K409	control	1	+	+	+	─	+
Patient 135	56	M	C187	T3 N1 M0	1	+	+	+	+	+
Patient 135	56	M	C187	T3 N1 M0	2	─	+	+	+	─
Patient 136	80	F	I839	control	1	─	+	+	─	─
Patient 137	75	F	K808	control	1	+	─	─	─	─
Patient 137	75	F	K808	control	2	+	─	─	─	─
Patient 138	74	M	C183	T3 N1 M0	none cultured	n.a.	n.a.	n.a.	n.a.	n.a.
Patient 139	58	M	C19	T3 N0 M0	1	─	─	─	─	─
Patient 139	58	M	C19	T3 N0 M0	2	─	─	─	─	─
Patient 139	58	M	C19	T3 N0 M0	3	─	─	─	─	─
Patient 140	78	M	C187	T1 N0 M0	1	─	─	─	─	─
Patient 141	53	M	C187	T1 N0 M0	1	─	─	─	─	─
Patient 142	79	F	C504	control	1	─	─	─	─	─
Patient 142	79	F	C504	control	2	─	─	─	─	─
Patient 143	82	F	K802	control	1	+	+	+	─	+
Patient 144	79	F	C503	control	none cultured	n.a.	n.a.	n.a.	n.a.	n.a.
Patient 145	81	F	C20	T2 N0 M0	1	─	─	─	─	─
Patient 146	64	M	K429	control	none cultured	n.a.	n.a.	n.a.	n.a.	n.a.
Patient 147	75	M	C187	T3 N0 M0	1	─	+	+	─	+
Patient 148	57	M	K802	control	none cultured	n.a.	n.a.	n.a.	n.a.	n.a.
Patient 149	54	M	C181	T1 N0 M0	1	─	+	+	─	─
Patient 149	54	M	C181	T1 N0 M0	2	─	+	+	─	─
Patient 150	69	M	C185	T3 N0 M0	1	─	─	─	─	─
Patient 151	69	M	C20	T3 N1 M0	1	─	+	+	─	─
Patient 152	82	M	C185	T4a N0 M0	1	─	─	─	─	─
Patient 153	50	F	C185	T3 N2 M0	none cultured	n.a.	n.a.	n.a.	n.a.	n.a.
Patient 154	60	F	K801	control	1	─	+	+	─	─
Patient 155	68	M	K439	control	1	+	+	+	─	+
Patient 156	85	M	C185	T3 N0 M0	1	─	+	+	+	+
Patient 156	85	M	C185	T3 N0 M1	2	─	+	+	+	+
Patient 157	72	F	K449	control	1	─	+	+	─	─
Patient 157	72	F	K449	control	2	─	+	+	─	─
Patient 158	75	F	K409	control	1	+	+	+	─	+
Patient 158	75	F	K409	control	2	─	─	─	─	─
Patient 159	86	M	C19	T3 N1b M0	1	+	+	+	─	─
Patient 160	63	M	C19	T3 N1b M0	1	─	─	─	+	─
Patient 161	78	M	C20	T2 N0 M0	1	─	─	─	─	─
Patient 162	64	F	K802	control	1	─	─	─	─	─
Patient 163	65	M	C186	T3 N0 M0	1	─	─	─	─	─
Patient 164	87	F	C500	control	1	─	─	─	─	─
Patient 165	77	M	C183	T3 N1 M0	1	─	─	─	─	─
Patient 166	73	M	C186	T3 Nx M1	1	─	─	─	─	─
Patient 166	73	M	C186	T3 Nx M1	2	─	─	─	─	─
Patient 167	72	M	C187	T3 N0 M0	1	+	+	+	─	─
Patient 167	72	M	C187	T3 N0 M0	2	─	─	─	─	─
Patient 167	72	M	C187	T3 N0 M0	3	─	─	─	─	─
Patient 168	67	F	K802	control	1	─	─	─	─	─
Patient 168	67	F	K802	control	2	─	─	─	─	─
Patient 169	75	M	K409	control	1	+	─	─	─	─
Patient 169	75	M	K409	control	2	─	+	+	─	─
Patient 170	70	M	K802	control	1	─	─	─	─	─
Patient 170	70	M	K802	control	2	─	─	─	─	─
Patient 171	78	F	C187	T3 N1 M0	1	─	─	─	─	─
Patient 172	64	M	C20	T2 N0 M0	1	+	+	+	─	+
Patient 172	64	M	C20	T2 N0 M0	2	─	─	─	─	─
Patient 172	64	M	C20	T2 N0 M0	3	─	─	─	─	─
Patient 173	66	F	C187	T3 N1b M0	1	─	─	─	─	─
Patient 173	66	F	C187	T3 N1b M0	2	─	─	─	─	─
Patient 173	66	F	C187	T3 N1b M0	3	─	─	─	─	─
Patient 174	82	M	C182	T1 N0 M0	1	─	+	+	─	─
Patient 174	82	M	C182	T1 N0 M0	2	─	+	+	─	─
Patient 175	73	F	C185	T2 N0 M0	1	─	─	─	─	─
Patient 175	73	F	C185	T2 N0 M0	2	+	+	+	─	+
Patient 176	88	F	C185	T3 N0 M0	1	─	─	─	─	─
Patient 177	73	M	C20	T3 N0 M0	1	─	─	─	─	─
Patient 177	73	M	C20	T3 N0 M0	2	─	─	─	─	─
Patient 177	73	M	C20	T3 N0 M0	3	+	+	+	─	─
Patient 177	73	M	C20	T3 N0 M0	4	+	+	+	─	─
Patient 178	77	M	K429	control	1	─	─	─	─	─
Patient 179	72	M	L022	control	1	─	+	+	─	─
Patient 180	64	M	C20	T1 NX MX	1	+	+	+	─	+
Patient 180	64	M	C20	T1 NX MX	2	─	─	─	─	─
Patient 181	78	M	C23	control	1	─	─	─	─	─
Patient 182	76	M	C160	control	1	─	─	─	─	─
Patient 183	75	F	K429	control	1	+	+	+	─	+
Patient 183	75	F	K429	control	2	─	─	─	─	─
Patient 183	75	F	K429	control	3	─	─	─	─	─
Patient 184	67	M	C187	T2 N0 M0	1	+	+	+	─	+
Patient 184	67	M	C187	T2 N0 M0	2	─	─	─	─	─
Patient 185	76	M	C182	T3 N0 M0	1	─	─	─	─	─
Patient 185	76	M	C182	T3 N0 M0	2	─	─	─	─	─
Patient 186	74	F	C182	T3 N2b M0	1	─	─	─	─	─
Patient 187	75	F	K409	control	1	─	─	─	─	─
Patient 187	75	F	K409	control	2	─	─	─	─	─
Patient 187	75	F	K409	control	3	─	─	─	─	─
Patient 188	77	M	K409	control	1	─	─	─	─	─
Patient 188	77	M	K409	control	2	─	+	+	─	─
Patient 189	78	F	K802	control	1	─	─	─	─	─
Patient 190	69	M	C180	T3 N1a M0	1	─	─	─	─	─
Patient 190	69	M	C180	T3 N1a M0	2	+	+	+	─	+
Patient 191	73	F	K641	control	none cultured	n.a.	n.a.	n.a.	n.a.	n.a.
Patient 192	77	F	C20	T3 N0 M0	1	+	+	+	+	+
Patient 192	77	F	C20	T3 N0 M0	2	+	+	+	+	+
Patient 193	78	F	K801	control	1	─	+	+	─	─
Patient 194	69	M	C183	T3 N0 M0	1	─	─	─	─	─
Patient 194	69	M	C183	T3 N0 M0	2	+	─	─	─	─
Patient 195	70	F	K802	control	1	─	─	─	─	─
Patient 196	60	M	K409	control	1	+	+	+	+	+
Patient 197	70	M	K409	control	1	─	─	─	─	─
Patient 197	70	M	K409	control	2	─	─	─	─	─
Patient 198	62	M	K802	control	1	─	─	─	─	─
Patient 198	62	M	K802	control	2	+	+	+	─	+
Patient 199	76	M	C187	T2 N0 M0	1	─	─	─	─	─
Patient 199	76	M	C187	T2 N0 M0	2	+	+	+	─	+
Patient 200	79	M	C189	T3 N1 M0	1	+	+	+	─	+
Patient 200	79	M	C189	T3 N1 M0	2	─	─	─	─	─
Patient 201	76	M	C180	T4a N0 M0	1	─	─	─	─	─
Patient 202	72	F	C19	T4 N1 M0	1	+	+	+	─	+
Patient 203	65	M	C20	T3 N1 M0	1	─	─	─	─	─
Patient 203	65	M	C20	T3 N1 M0	2	─	─	─	─	─
Patient 204	66	M	C20	T3 N0 M0	1	─	─	─	+	─
Patient 204	66	M	C20	T3 N0 M0	2	─	─	─	+	─
Patient 205	72	F	C182	T1 N0 M0	1	─	+	+	─	─
Patient 206	67	M	C187	T3 N1 M1	1	─	─	─	─	─
Patient 206	67	M	C187	T3 N1 M1	2	─	─	─	─	─
Patient 207	77	M	C182	T3 N2 M0	1	─	+	+	─	─
Patient 208	79	F	C186	T4 N0 M0	1	─	─	─	─	─
Patient 209	72	M	C187	T3 N0 M0	1	+	+	+	─	+
Patient 210	80	M	C20	T3 N0 M0	1	+	+	+	─	+
Patient 211	66	M	D377	adenoma	1	─	─	─	─	─
Patient 212	76	F	K409	control	1	─	─	─	─	─
Patient 212	76	F	K409	control	2	+	─	─	─	+
Patient 213	78	F	C182	T2 N0 M0	none cultured	n.a.	n.a.	n.a.	n.a.	n.a.
Patient 214	68	M	C20	T1 N0 M0	1	─	─	─	─	─
Patient 215	63	F	C20	T1 N0 M0	1	─	─	─	─	─
Patient 216	73	F	K802	control	1	+	+	+	─	+
Patient 217	68	M	L609	control	1	─	─	─	─	─
Patient 217	68	M	L609	control	2	─	─	─	─	─
Patient 218	60	F	K573	control	1	+	─	─	─	─
Patient 219	84	M	K432	control	1	─	+	+	─	─
Patient 220	63	M	K429	control	1	─	─	─	─	─
Patient 221	65	F	K429	control	1	─	─	─	─	─
Patient 222	66	M	K409	control	1	─	─	─	─	─
Patient 223	69	F	K805	control	1	─	─	─	─	─
Patient 223	69	F	K805	control	2	─	─	─	─	─
Patient 224	80	M	K409	control	1	+	+	+	+	+
Patient 225	84	F	C19	T2 N0 M0	1	+	+	+	─	+
Patient 225	84	F	C19	T2 N0 M0	2	─	+	+	+	─
Patient 226	79	M	C20	T1 N0 M0	1	+	+	+	─	+
Patient 226	79	M	C20	T1 N0 M0	2	─	─	─	─	─
Patient 227	70	M	C180	T3 N0 M0	1	+	+	+	─	─
Patient 228	86	M	K409	control	1	─	─	─	─	─
Patient 229	53	M	D374	adenoma	1	─	─	─	─	─
Patient 229	53	M	D374	adenoma	2	─	─	─	─	─
Patient 229	53	M	D374	adenoma	3	─	─	─	─	─
Patient 230	64	M	C187	T3 N0 M0	none cultured	n.a.	n.a.	n.a.	n.a.	n.a.
Patient 231	67	M	K409	control	1	─	─	─	─	─
Patient 232	64	M	K429	control	none cultured	n.a.	n.a.	n.a.	n.a.	n.a.
Patient 233	60	F	C185	T0 N0 M0	none cultured	n.a.	n.a.	n.a.	n.a.	n.a.
Patient 234	79	M	K409	control	1	─	─	─	─	─
Patient 235	79	M	K409	control	1	─	─	─	─	─
Patient 236	71	F	K802	control	1	─	─	─	─	─
Patient 237	60	F	C187	T3 N1 M0	1	─	+	+	─	─
Patient 238	77	M	C180	T1 N0 M0	1	+	+	+	─	+
Patient 239	70	F	K449	control	1	─	─	─	─	─
Patient 240	67	M	K409	control	1	─	─	─	─	─
Patient 240	67	M	K409	control	2	─	+	+	─	─
Patient 240	67	M	K409	control	3	─	─	─	─	─
Patient 241	72	F	K805	control	1	─	─	─	─	─
Patient 242	80	F	K409	control	1	─	+	+	─	─
Patient 243	65	M	C180	T2 N0 M0	1	─	─	─	─	─
Patient 243	65	M	C180	T2 N0 M0	2	+	+	+	─	+
Patient 244	65	M	C20	T4 N1 M1	1	─	─	─	─	─
Patient 245	60	M	C20	T3 N2 M0	1	+	+	+	─	+
Patient 245	60	M	C20	T3 N2 M0	2	─	─	─	─	─
Patient 246	54	M	C187	T2 N0 M0	1	─	─	─	─	─
Patient 246	54	M	C187	T2 N0 M0	2	+	─	─	─	+
Patient 246	54	M	C187	T2 N0 M0	3	─	─	─	─	─
Patient 247	53	M	C20	T1 N0 M0	1	─	─	─	─	─
Patient 247	53	M	C20	T1 N0 M0	2	+	+	+	─	+
Patient 248	81	M	K409	control	1	─	─	─	─	─
Patient 248	81	M	K409	control	2	─	─	─	─	─
Patient 249	72	M	C19	T3 N1 M0	1	─	─	─	─	─
Patient 249	72	M	C19	T3 N1 M0	2	─	─	─	─	─
Patient 249	72	M	C19	T3 N1 M0	3	─	─	─	─	─
Patient 250	74	F	C187	T2 N0 M0	1	─	+	+	─	─
Patient 251	73	F	D127	adenoma	1	+	─	─	─	─
Patient 252	68	M	D374	adenoma	1	─	+	+	─	─
Patient 252	68	M	D375	adenoma	2	─	─	─	─	─
Patient 253	67	M	K805	control	1	─	─	─	─	─
Patient 254	64	F	C19	T3 N1 M0	1	─	─	─	─	─
Patient 254	64	F	C19	T3 N1 M0	2	─	─	─	─	─
Patient 255	71	F	K449	control	1	─	─	─	─	─
Patient 255	71	F	K449	control	2	─	─	─	─	─
Patient 256	59	F	C182	T3 N2 M0	1	─	+	+	─	─
Patient 257	77	M	C180	T2 N0 M0	1	─	+	+	─	─
Patient 258	69	M	C183	T4 N2 M0	1	─	─	─	─	─
Patient 258	69	M	C183	T4 N2 M0	2	─	─	─	─	─
Patient 259	77	M	K808	control	1	─	─	─	─	─
Patient 259	77	M	K808	control	2	─	─	─	─	─
Patient 260	61	M	C20	T3 N1 M0	1	─	─	─	─	─
Patient 260	61	M	C20	T3 N1 M0	2	─	─	─	─	─
Patient 260	61	M	C20	T3 N1 M0	3	─	─	─	─	─
Patient 261	64	M	C20	T3 N1 M0	1	─	─	─	─	─
Patient 261	64	M	C20	T3 N1 M0	2	─	─	─	─	─
Patient 262	68	M	C19	T1 N0 M0	1	─	─	─	─	─
Patient 262	68	M	C19	T1 N0 M0	2	─	─	─	─	─
Patient 262	68	M	C19	T1 N0 M0	3	─	─	─	─	─
Patient 263	90	M	C187	T4 NX M0	1	─	─	─	─	─
Patient 263	90	M	C187	T4 NX M0	2	─	─	─	─	─
